# Supplementary figures and images for: Cytomegalovirus restricts ICOSL expression on antigen-presenting cells disabling T cell co-stimulation and contributing to immune evasion
Source: eLife journal article supplement (doi:10.7554/elife.59350), 2021-01-18

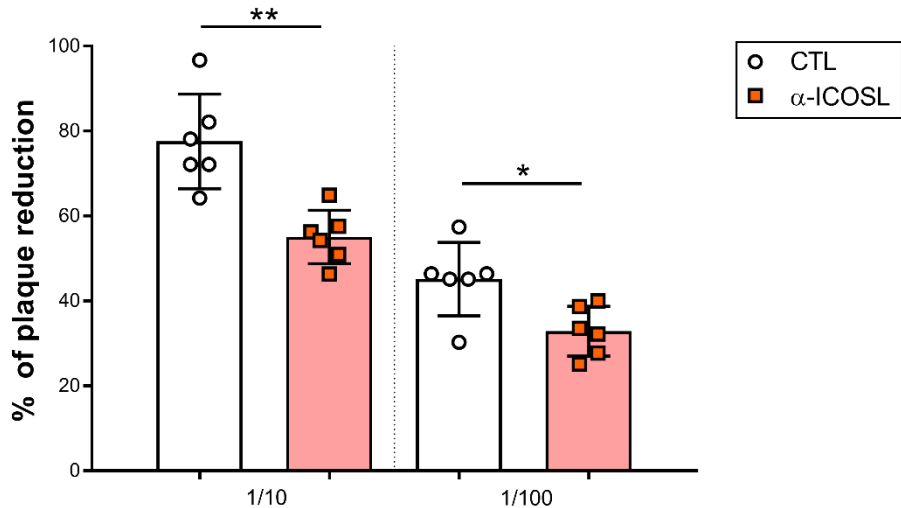

Supplement: supp [file elife-59350-supp-v1.zip]

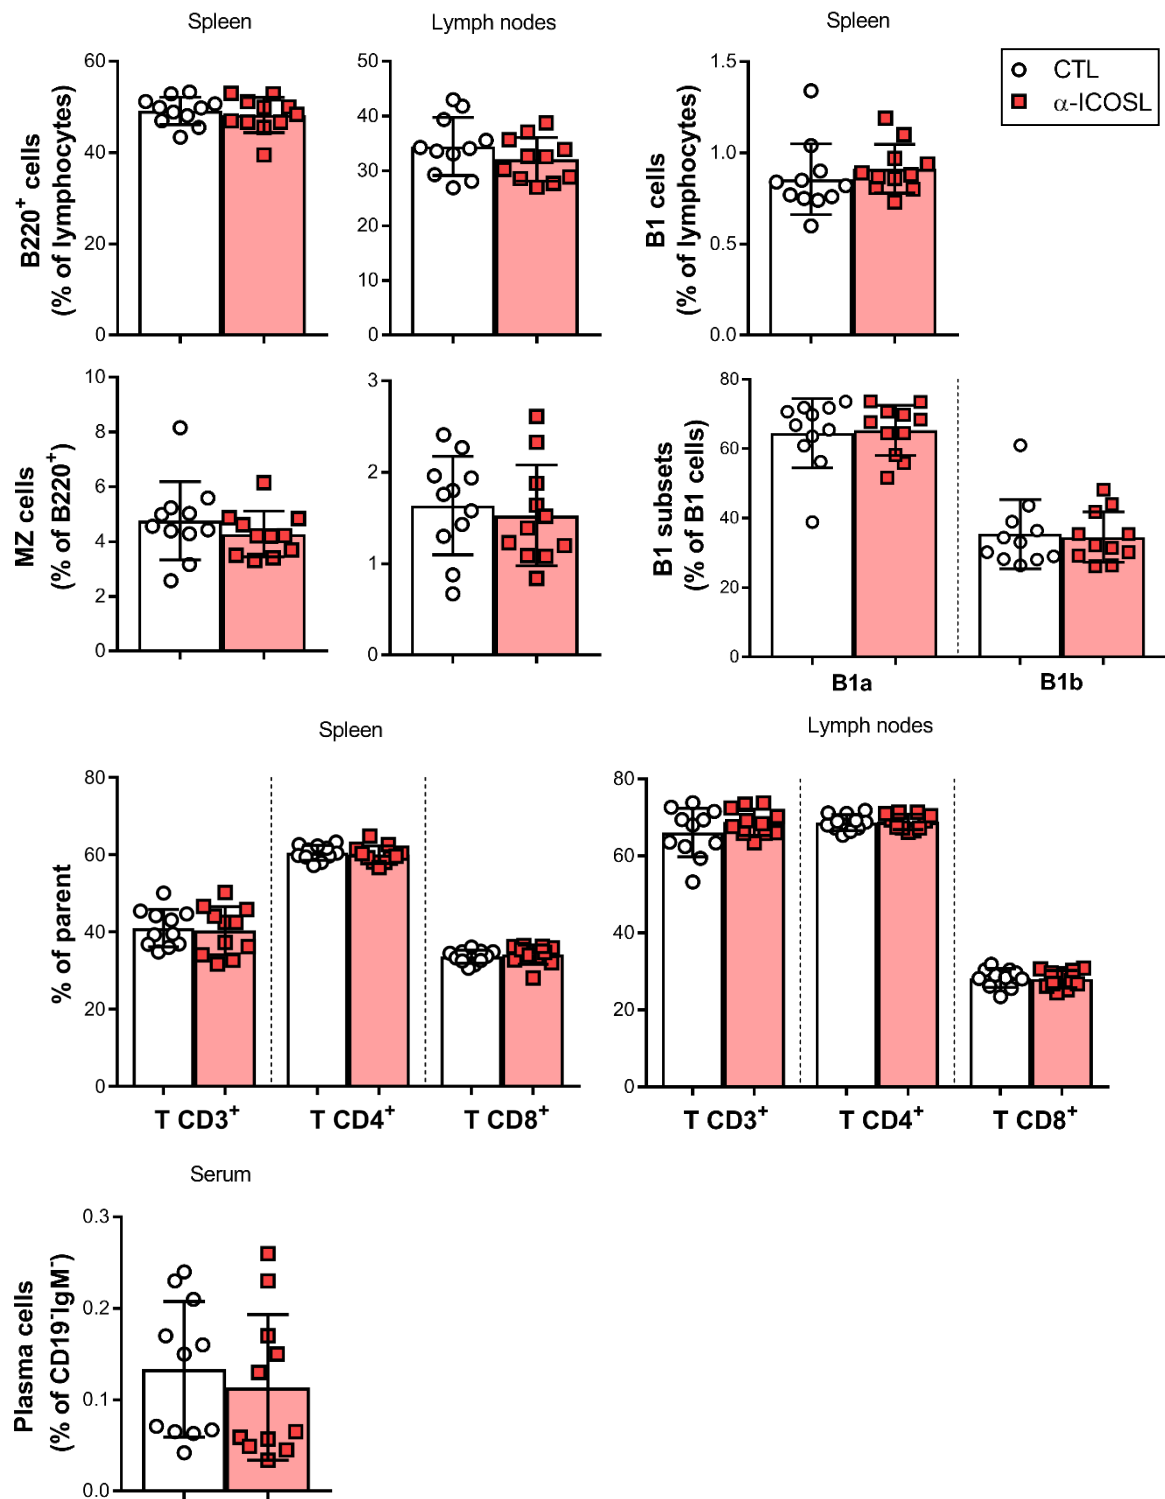

Supplement: supp [file elife-59350-supp-v1.zip]

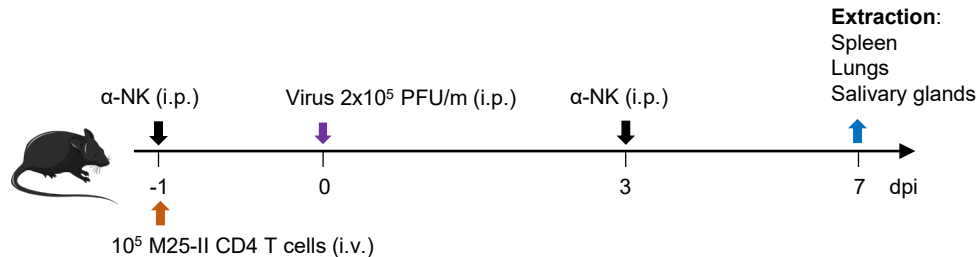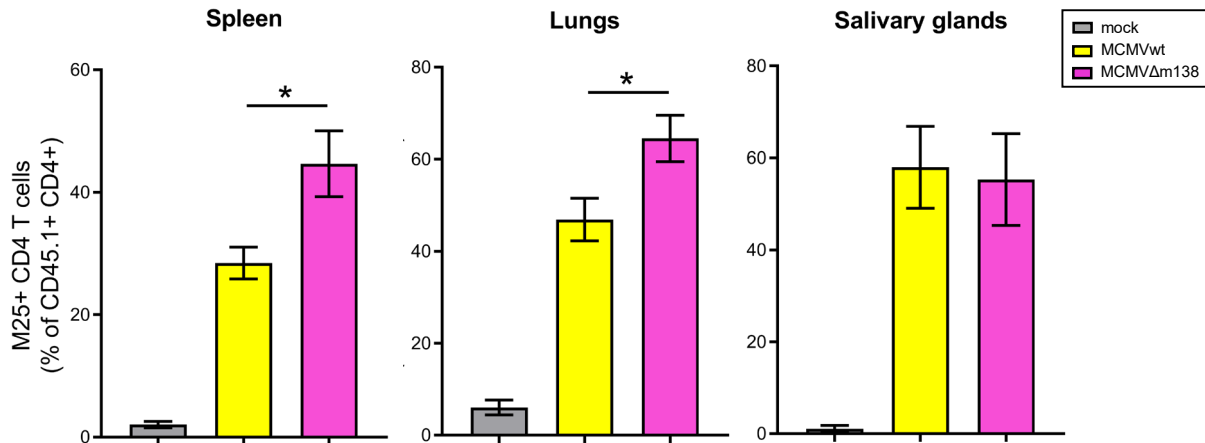

Supplement: supp [file elife-59350-supp-v1.zip]

DAPI

MCMV-GFP

m138

a

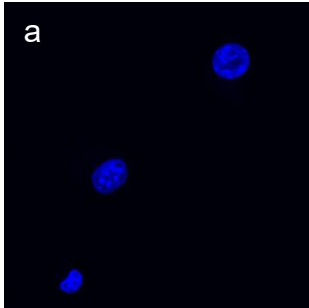

b

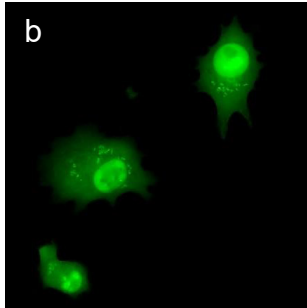

c

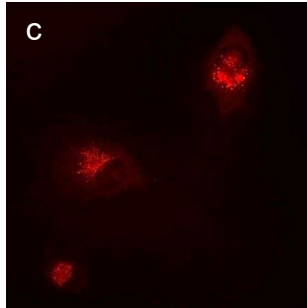

d

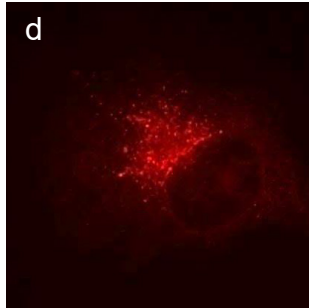

Supplement: supp [file elife-59350-supp-v1.zip]
